# Supplementary material for: Experimental and modeling study of the oxidation of n-butane in a jet stirred reactor using cw-CRDS measurements
Source: Royal Society of Chemistry journal article supplement (doi:10.1039/c3cp53335b), 2013-01-01
Supplement: c3cp53335b.pdf [file c3cp53335b.pdf]

## Supplemental Material

Chiheb Bahrini, Pranay Morajkar, Coralie Schoemeacker, Ophélie Frottier, Olivier Herbinet,  
Pierre Alexandre Glaude, Frédérique Battin-Leclerc and Christa Fittschen,

### New insights in the oxidation of *n*-butane in a jet stirred reactor using cw-CRDS measurements

*Phys. Chem. Chem. Phys.*, 2013.

|                           |
|---------------------------|
| <h2>Table of content</h2> |
|---------------------------|

|                                                                                                                                      |          |
|--------------------------------------------------------------------------------------------------------------------------------------|----------|
| <i>I/ Evolution with temperature of concentration of minor compounds of the oxidation of n-butane measured by gas chromatography</i> | <u>2</u> |
| <i>II/ Full absorption spectra</i>                                                                                                   | <u>6</u> |

## I/ Evolution with temperature of concentration of minor compounds of the oxidation of *n*-butane measured by gas chromatography

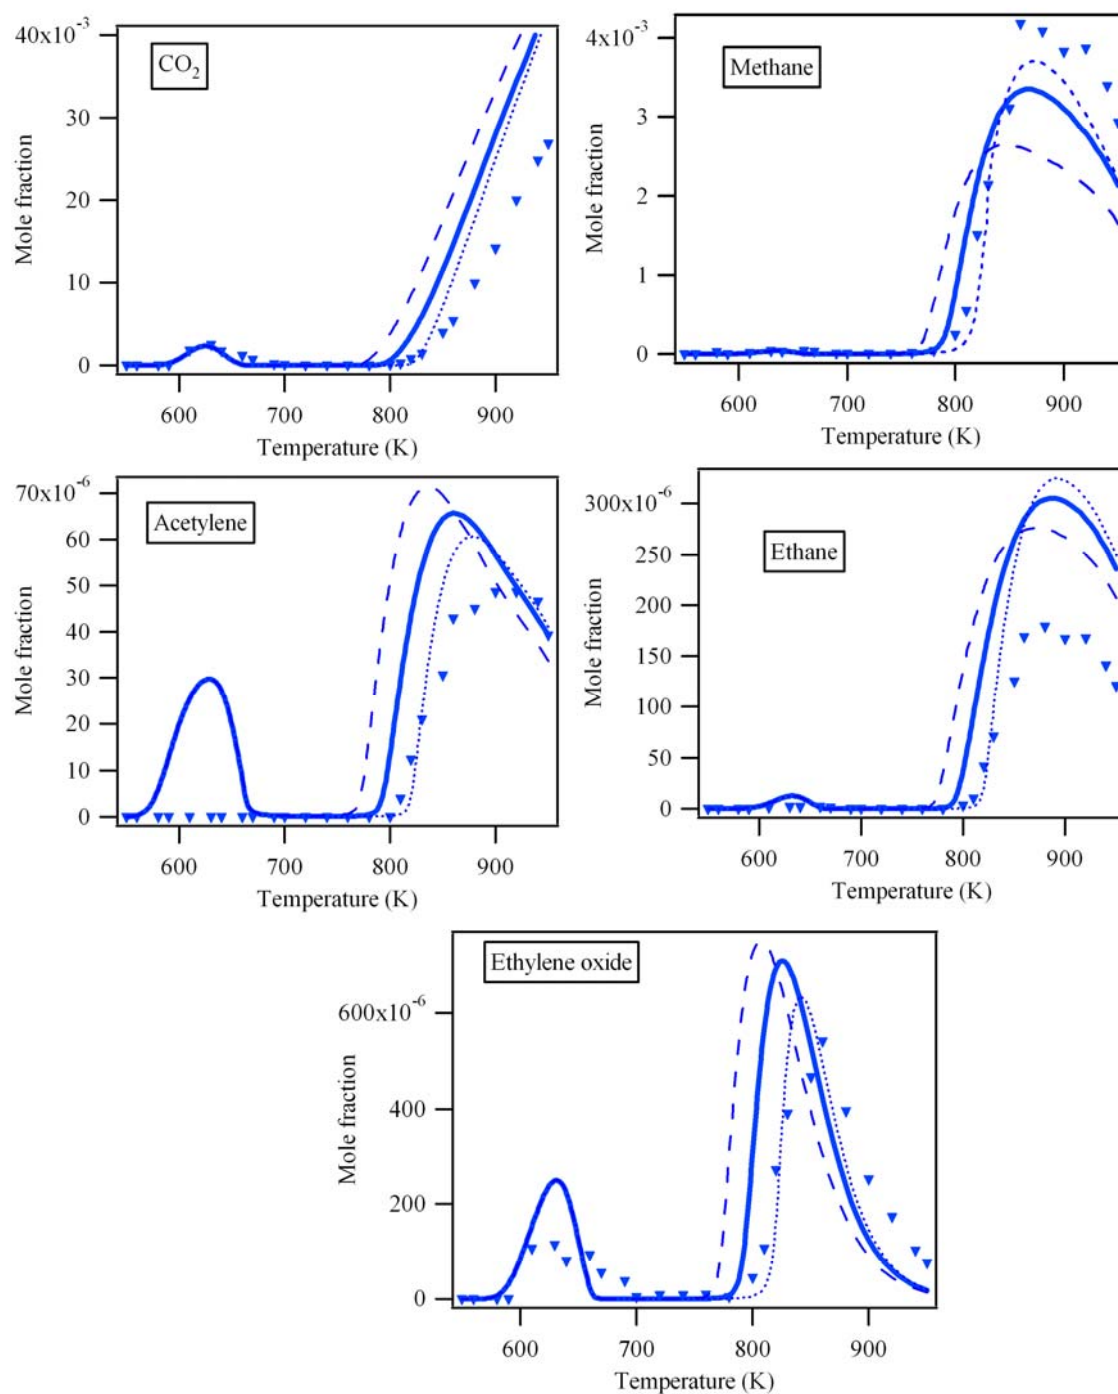

**Figure S1:** Evolution with temperature of the experimental (blues triangles) and simulated (full line) mole fractions of carbon dioxide, methane, acetylene and ethane.

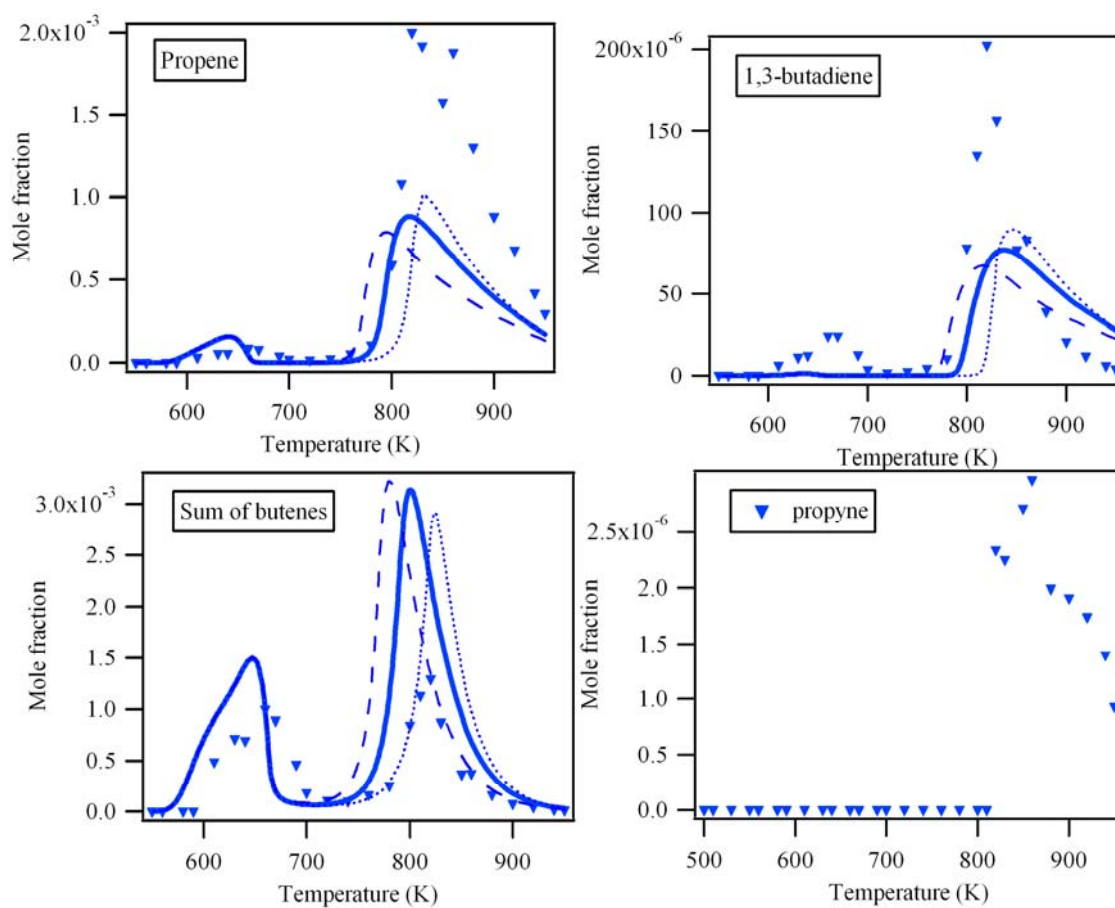

**Figure S2:** Evolution with temperature of the experimental (blues triangles) and simulated (full line) mole fractions of C<sub>3</sub>-C<sub>4</sub> hydrocarbons. Propyne is not included in the used model.

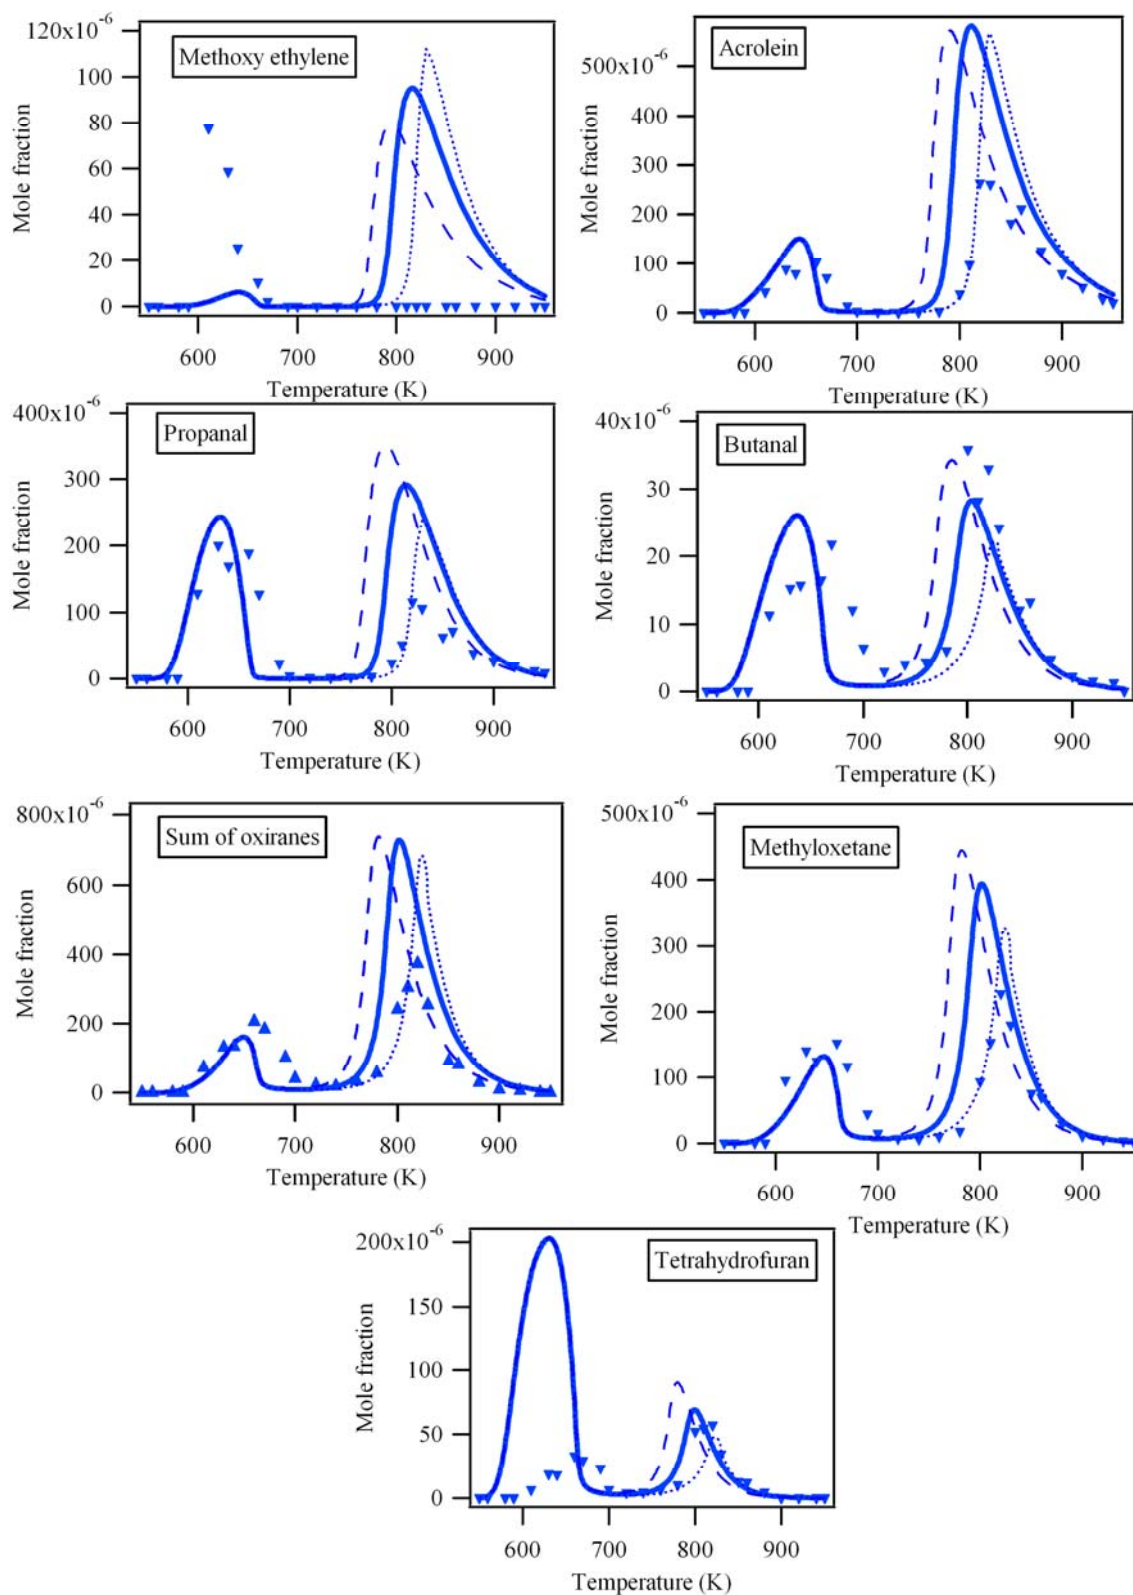

**Figure S3:** Evolution with temperature of the experimental (blues triangles) and simulated (full line) mole fractions of minor oxygenated species – part 1.

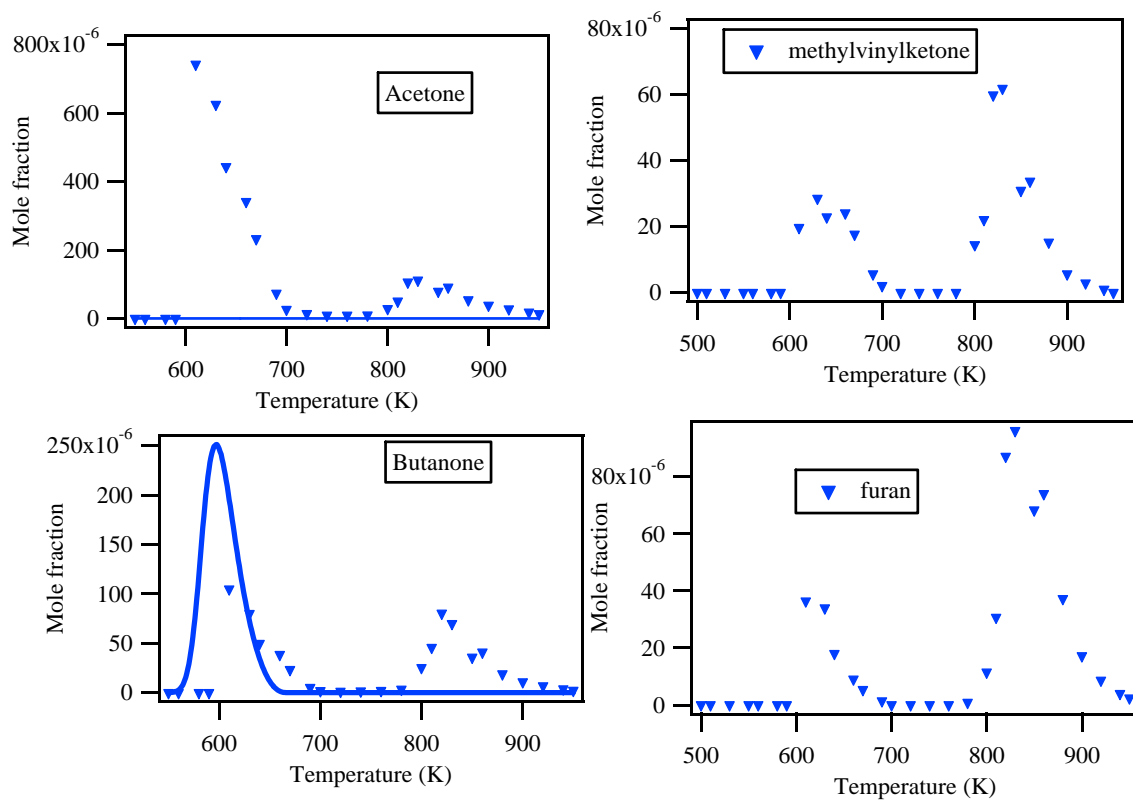

F

**figure S4:** Evolution with temperature of the experimental (blues triangles) and simulated (full line) mole fractions of minor oxygenated species – part 2. Acetone, methylvinylketone and furan are not included in the used model.

## II/ Full absorption spectra

**Figure S5** Absorption spectrum in the range 6620 - 6644  $\text{cm}^{-1}$  for the major absorbing reaction products: units are ring down time  $\tau$  as a function of wavenumber for  $\text{H}_2\text{O}_2$ ,  $\text{H}_2\text{O}$  and  $\text{C}_2\text{H}_4$ , as well as the spectrum such as observed from the oxidation of n-butane at 638 K and 875 K, absorption cross sections  $\sigma$  in  $20^{-21} \text{cm}^2$  taken from Staak *et al*<sup>1</sup> for  $\text{CH}_2\text{O}$

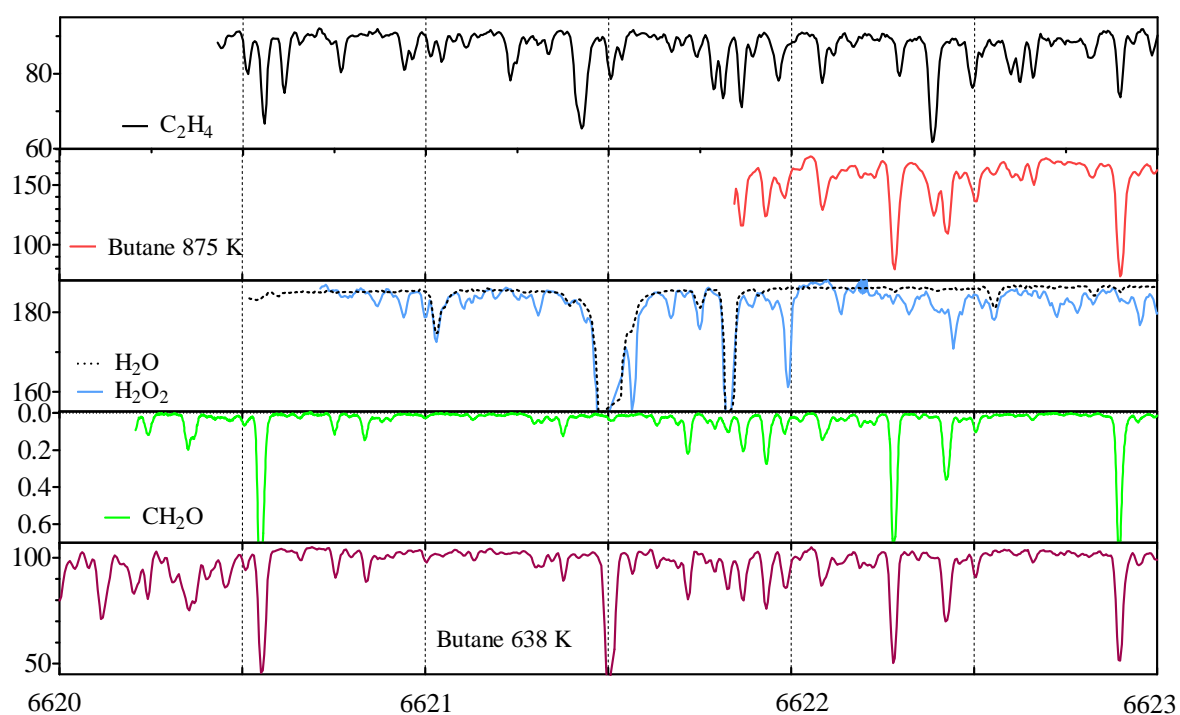

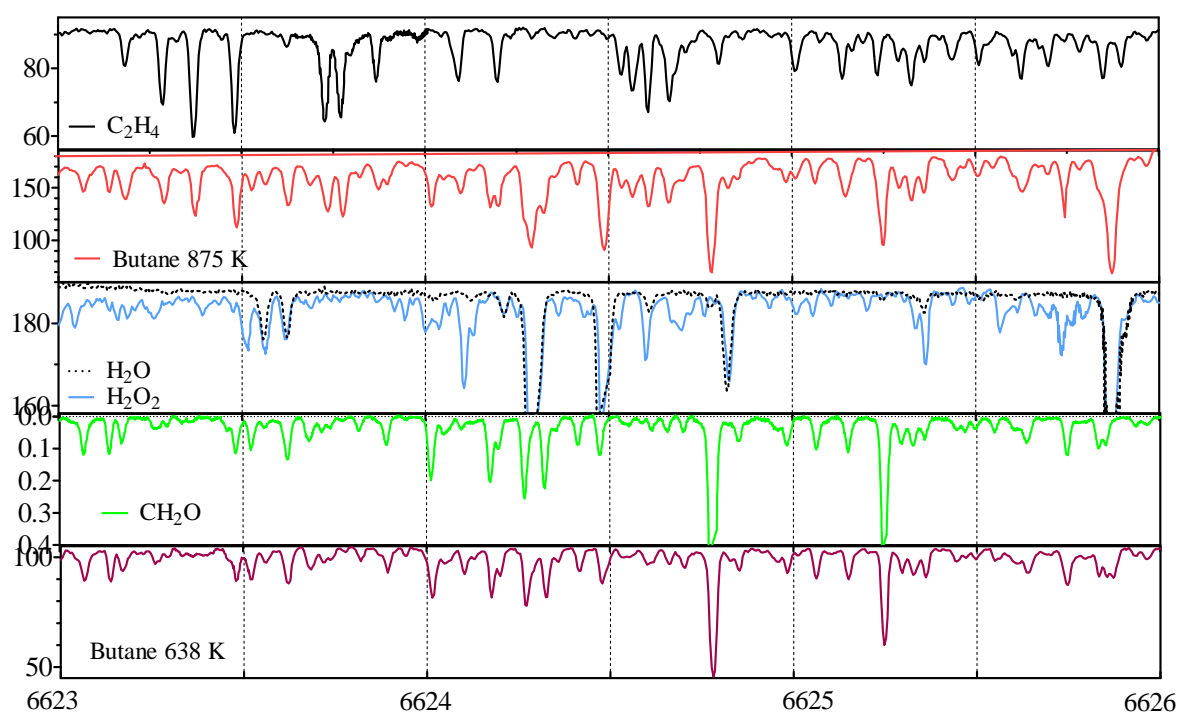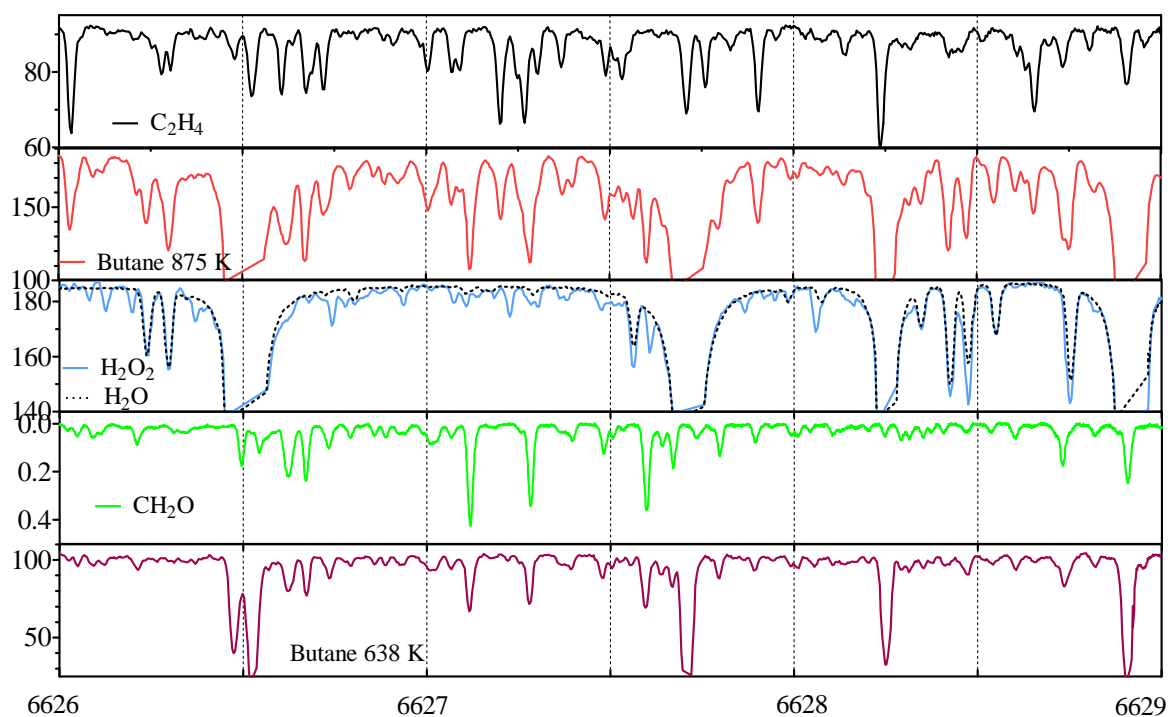

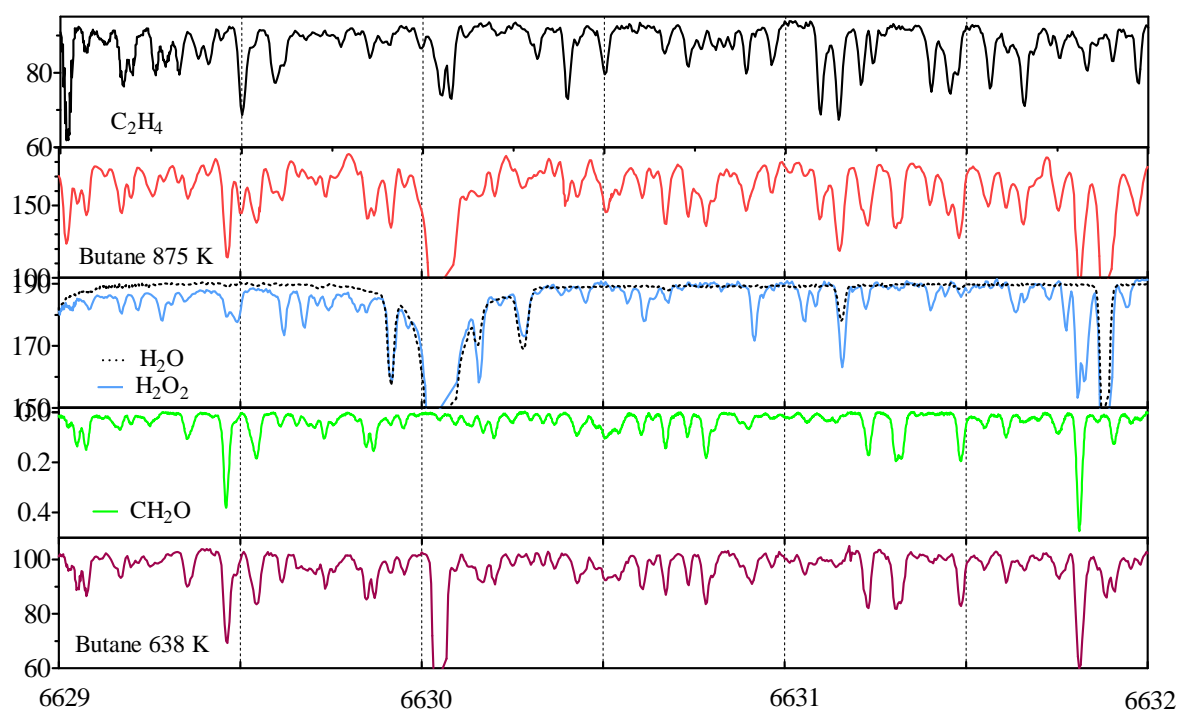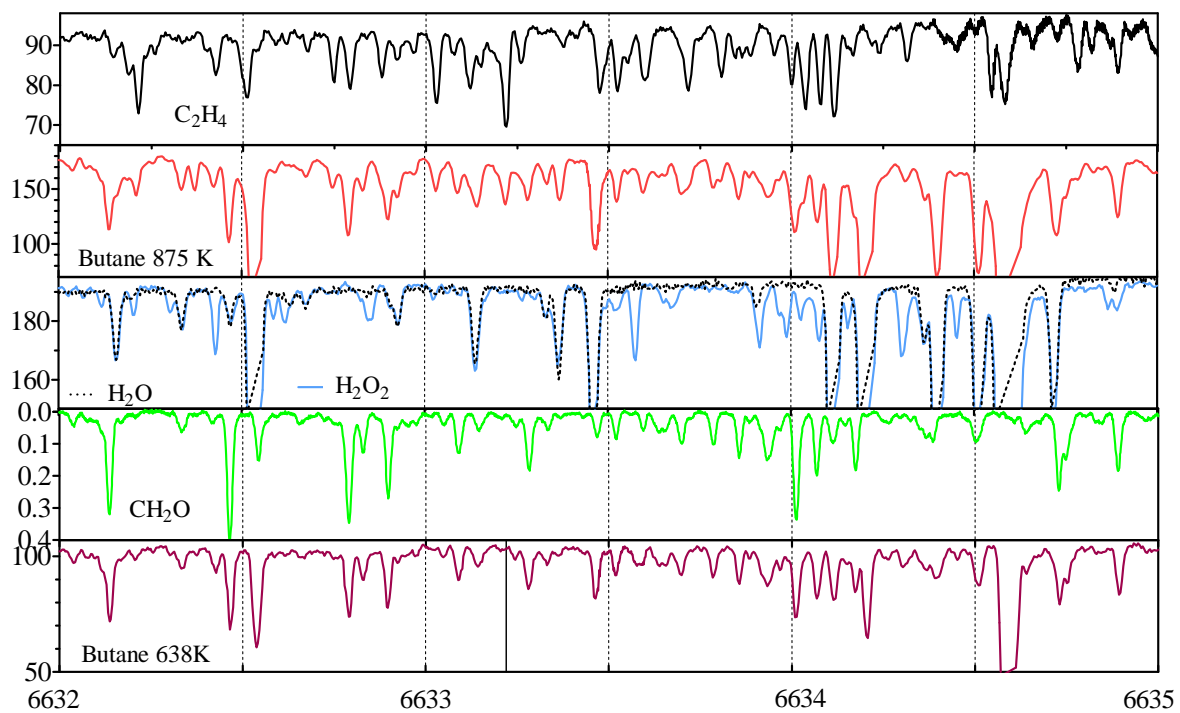



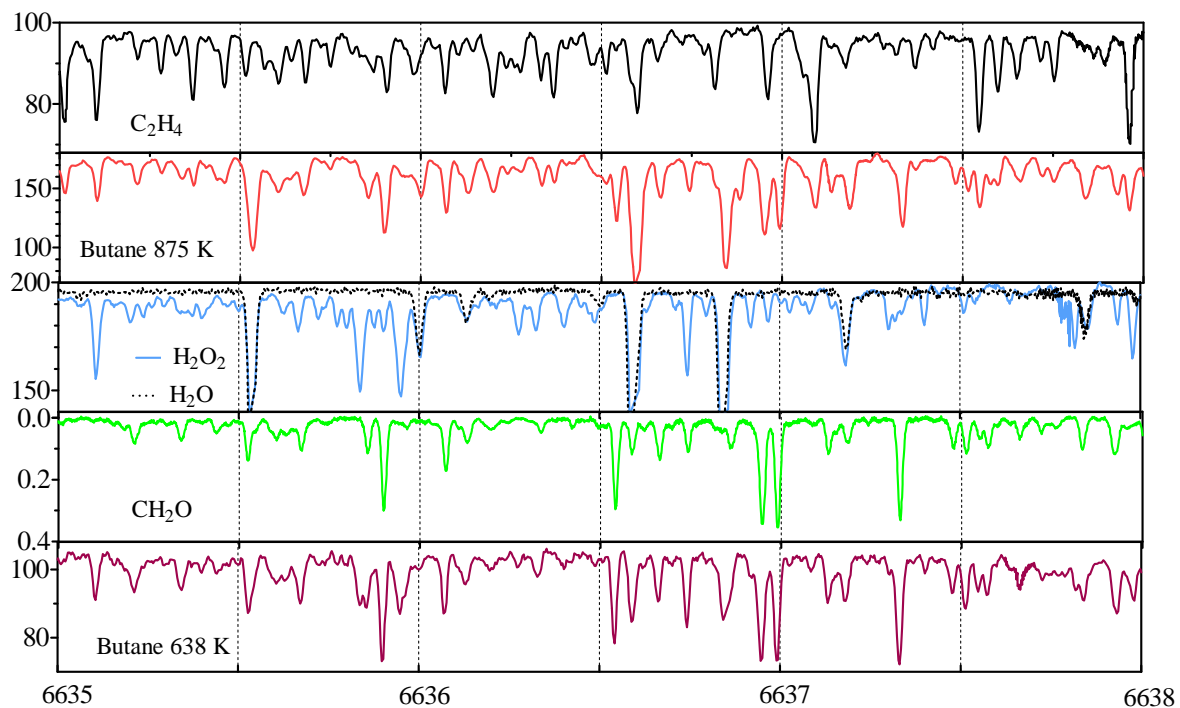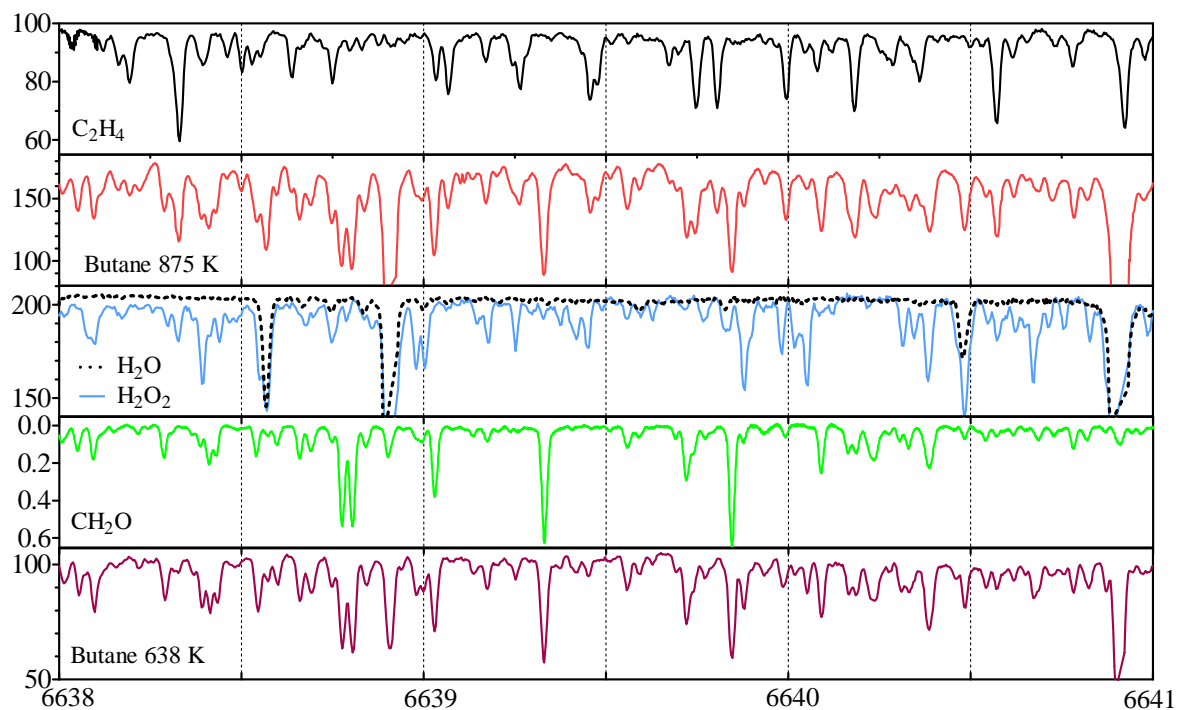

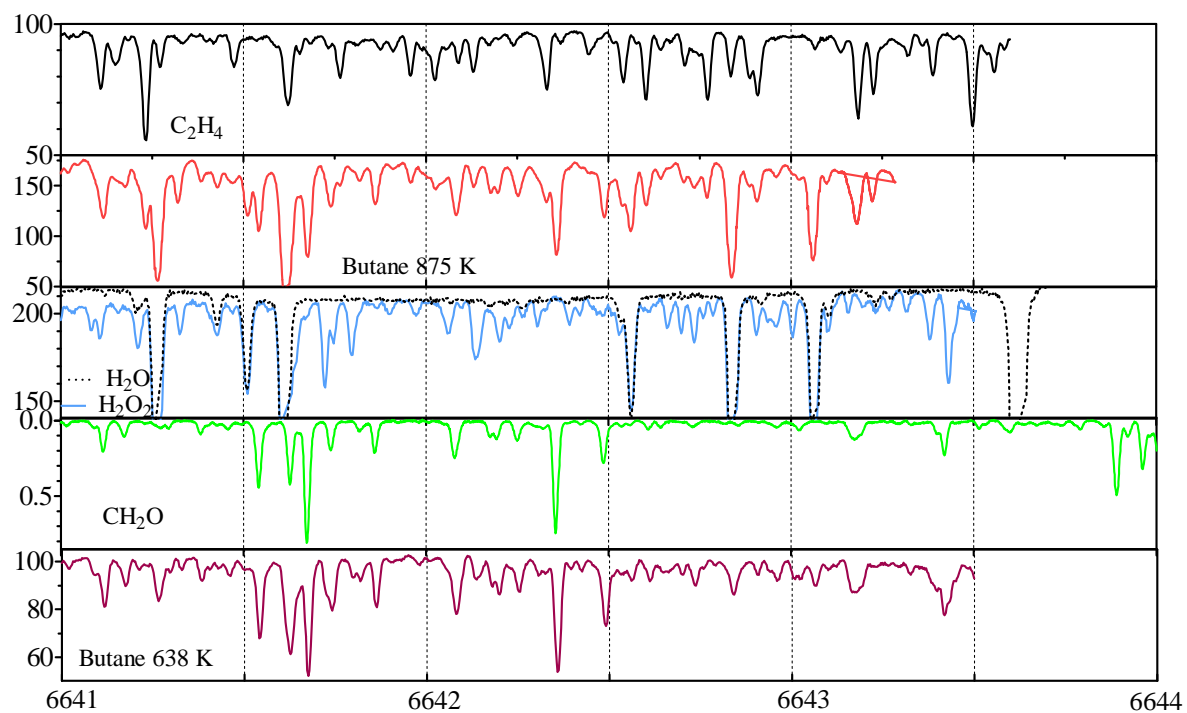

## VI/ Supplementary references

1. M. Staak, E. W. Gash, D. S. Venables and A. A. Ruth, *J. Mol. Spectrosc.*, 2005, **229**, 115-121.
